# Supplementary material for: Synthesis, crystallographic structure, theoretical analysis, molecular docking studies, electronic properties and biological activity evaluation of ruthenium-complex bearing N-heterocyclic carbene ligand
Source: Royal Society of Chemistry journal article supplement (doi:10.1039/d3nj01598j), 2023-01-01
Supplement: d3nj01598j1.pdf [file d3nj01598j1.pdf]

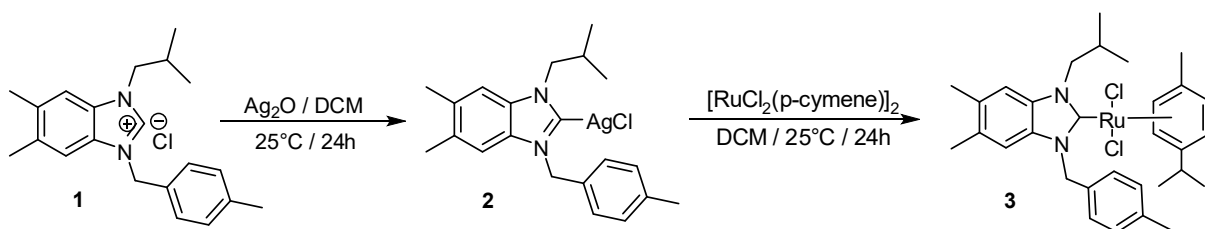

### Preparation of benzimidazolium salts (1)

The benzimidazolium salts **1** were prepared by reacting 1-isobutyl-benzimidazole (1mmol) (**1**) with 4-methylbenzylchloride (1,1mmol) in dimethylformamide(DMF ; 5 mL) at 80°C and the resulting mixture was stirred for 24 hours. Diethyl ether (15 mL) was added to obtain a white crystalline solid, which was subsequently filtered off. The solid was washed with diethyl ether (3×10 mL), dried under vacuum, and the crude product was recrystallized from Dichloromethane/diethyl ether (1:3 ratio).

### Preparation of silver(I)–NHC complexes (2)

A solution of benzimidazolium salt **1** (1.0 mmol) and Ag<sub>2</sub>O (1.0 mmol) in dichloromethane (15 mL) was stirred at room temperature for 24 h. The reaction mixture was filtered through celite and the solvent removed under reduced pressure. The crude product **2** was recrystallized from dichloromethane/diethyl ether (1:3).

### Preparation of Ru(II)–NHC complexes (3)

The NHC ruthenium complexes **3** were synthesized by transmetalation via silver NHC complexes **2**. 10 mmol of Ag-NHC complex with 5 mmol of [RuCl<sub>2</sub> (p-cymene)]<sub>2</sub> dissolved in 30 ml of DCM and the mixture was stirred for 24 hours in the dark at room temperature, then the solution was filtered on celite and crystallized from DCM: diethyl ether (1: 2) at room temperature.

#### 1-(isobutyl)-3-(4-methylbenzyl) -5,6-dimethylbenzimidazolium chloride, (1)

Yield 93%, C<sub>21</sub>H<sub>27</sub>ClN<sub>2</sub>, M = 342.91 g mol<sup>-1</sup>, Mp: 223.2°C, ν(CN) = 1561 cm<sup>-1</sup>. <sup>1</sup>H NMR (CDCl<sub>3</sub>, 400 MHz) δ (ppm) 1.04 (d, 6H, CH<sub>3</sub>(<sub>a,b</sub>), J = 8 Hz), 2.31 (s, 3H, CH<sub>3</sub>(<sub>e</sub>)), 2.38 (s, 3H, CH<sub>3</sub>(<sub>e</sub>)), 2.42 (s, 3H, CH<sub>3</sub>(<sub>d</sub>)), 2.39 (hept, 1H, H<sub>2</sub>, J = 4 Hz), 4.36 (d, 2H, H<sub>1</sub>, J = 8 Hz), 5.79 (s, 2H, H<sub>1'</sub>), 7.15 – 7.39 (m, 6H, H<sub>4</sub>, 7,3'', 4'', 6'', 7''), 11.83 (s, 1H, H<sub>2</sub>). <sup>13</sup>C NMR (CDCl<sub>3</sub>, 100 MHz) δ (ppm) 19.8 (C(<sub>c,d</sub>)), 20.6 (C(<sub>a,b</sub>)), 21.1 (C(<sub>e</sub>)), 28.7 (C(<sub>2</sub>')), 50.9 (C(<sub>1</sub>'')), 54.2 (C(<sub>1</sub>'')), 112.7 (C(<sub>4</sub>)), 113.4 (C(<sub>7</sub>)), 128.1 (C(<sub>3</sub>'', 4'', 6'', 7'')), 129.9 (C(<sub>8,9</sub>)), 130.1 (C(<sub>2</sub>'')), 130.2 (C(<sub>5</sub>'')), 137.2 (C(<sub>5,6</sub>)), 142.7 (C(<sub>2</sub>)).

#### chloro-[1-(isobutyl)-3-(4-methylbenzyl) -5,6-dimethylbenzimidazole-2-ylidene]silver(I), (2)

Yield 93%, Mp: 161.2°C, ν(CN) = 1433 cm<sup>-1</sup>. <sup>1</sup>H NMR (CDCl<sub>3</sub>, 400 MHz) δ (ppm) 1.00 (d, 6H, CH<sub>3</sub>(<sub>a,b</sub>), J = 4 Hz), 2.31 (s, 3H, CH<sub>3</sub>(<sub>c,d</sub>)), 2.34 (hept, 1H, H<sub>2</sub>, J = 4 Hz), 2.37 (s, 3H, CH<sub>3</sub>(<sub>e</sub>)), 4.17 (d, 2H, H<sub>1</sub>, J = 8 Hz), 5.50 (s, 2H, H<sub>1'</sub>), 7.12 – 7.26 (m, 6H, H<sub>4</sub>, 7,3'', 4'', 6'', 7''). <sup>13</sup>C NMR (CDCl<sub>3</sub>, 100 MHz) δ (ppm) 20.3 (C(<sub>c,d</sub>)), 20.4 (C(<sub>a</sub>)), 20.4 (C(<sub>b</sub>)), 21.1 (C(<sub>e</sub>)), 29.2 (C(<sub>2</sub>')), 53.0 (C(<sub>1</sub>'')), 56.7 (C(<sub>1</sub>'')), 111.8 (C(<sub>4</sub>)), 112.2 (C(<sub>7</sub>)), 126.9 (C(<sub>3</sub>'', 7'')), 129.7 (C(<sub>4</sub>'', 6'')), 133.1 (C(<sub>2</sub>'', 5'')), 133.5 (C(<sub>8,9</sub>)), 133.5 (C(<sub>5</sub>)), 138.2 (C(<sub>6</sub>)) C<sub>2</sub>:

Ag-C<sub>carbene</sub>: not observed. Elemental analysis % calcd. (found) for C<sub>21</sub>H<sub>26</sub>AgClN<sub>2</sub>: C, 56.079% (56.1); H, 5.827% (5.9); N, 6.228% (6.4).

### Dichloro-[1-(isobutyl)-3-(4-methylbenzyl)-5,6-dimethylbenzimidazole-2-ylidene](p-cymene)ruthenium (II), (3)

Yield 79%, Mp: 167,8°C,  $\nu(\text{CN}) = 1402 \text{ cm}^{-1}$ . <sup>1</sup>H NMR (CDCl<sub>3</sub>, 400 MHz)  $\delta$  (ppm) 0.98 (d, 6H, CH<sub>3</sub>(a,b),  $J = 4 \text{ Hz}$ ), 1.27 (d, 6H, CH<sub>3</sub>(g,h),  $J = 4 \text{ Hz}$ ), 1.97 (s, 3H, CH<sub>3</sub>(f)), 2.21 (s, 3H, CH<sub>3</sub>(e)), 2.32 (d, 6H, CH<sub>3</sub>(c,d),  $J = 8 \text{ Hz}$ ), 2.66 (hept, 1H, H<sub>2</sub>,  $J = 8 \text{ Hz}$ ), 2.86 (hept, 1H, H<sub>7''''</sub>,  $J = 4 \text{ Hz}$ ), 4.53 (d, 2H, H<sub>1'</sub>,  $J = 8 \text{ Hz}$ ), 5.11 (s, 2H, H<sub>1''</sub>), 5.38 (d, 2H, H<sub>1''''</sub>,  $J = 8 \text{ Hz}$ ), 5.60 (d, 2H, H<sub>4''''</sub>,  $J = 8 \text{ Hz}$ ), 6.78-7.22 (m, 6H, H<sub>4,7,3',4',6',7'</sub>). <sup>13</sup>C NMR (CDCl<sub>3</sub>, 100 MHz)  $\delta$  (ppm) 18.3 (C<sub>(c,d)</sub>), 20.1 (C<sub>(a,b)</sub>), 20.3 (C<sub>(f,g,h)</sub>), 21.0 (C<sub>(e)</sub>), 27.9 (C<sub>2'</sub>), 30.7 (C<sub>7''''</sub>), 52.4 (C<sub>1''</sub>), 55.7 (C<sub>1'</sub>), 97.2 (C<sub>4</sub>), 112.0 (C<sub>7</sub>), 125.6 (C<sub>3'';4'';6'';7''</sub>), 129.5 (C<sub>1'';3'';4'';6''</sub>), 131.6 (C<sub>8</sub>), 131.9 (C<sub>9</sub>), 134.1 (C<sub>2'';2''''</sub>), 134.3 (C<sub>5'';5''''</sub>), 134.9 (C<sub>5</sub>), 136.9 (C<sub>6</sub>), 187.9 (C<sub>2</sub>). Elemental analysis % calcd. (found) for C<sub>31</sub>H<sub>40</sub>Cl<sub>2</sub>N<sub>2</sub>Ru: C, 60.676% (60.1); H, 6.734% (6.8); N, 4.565% (4.6).

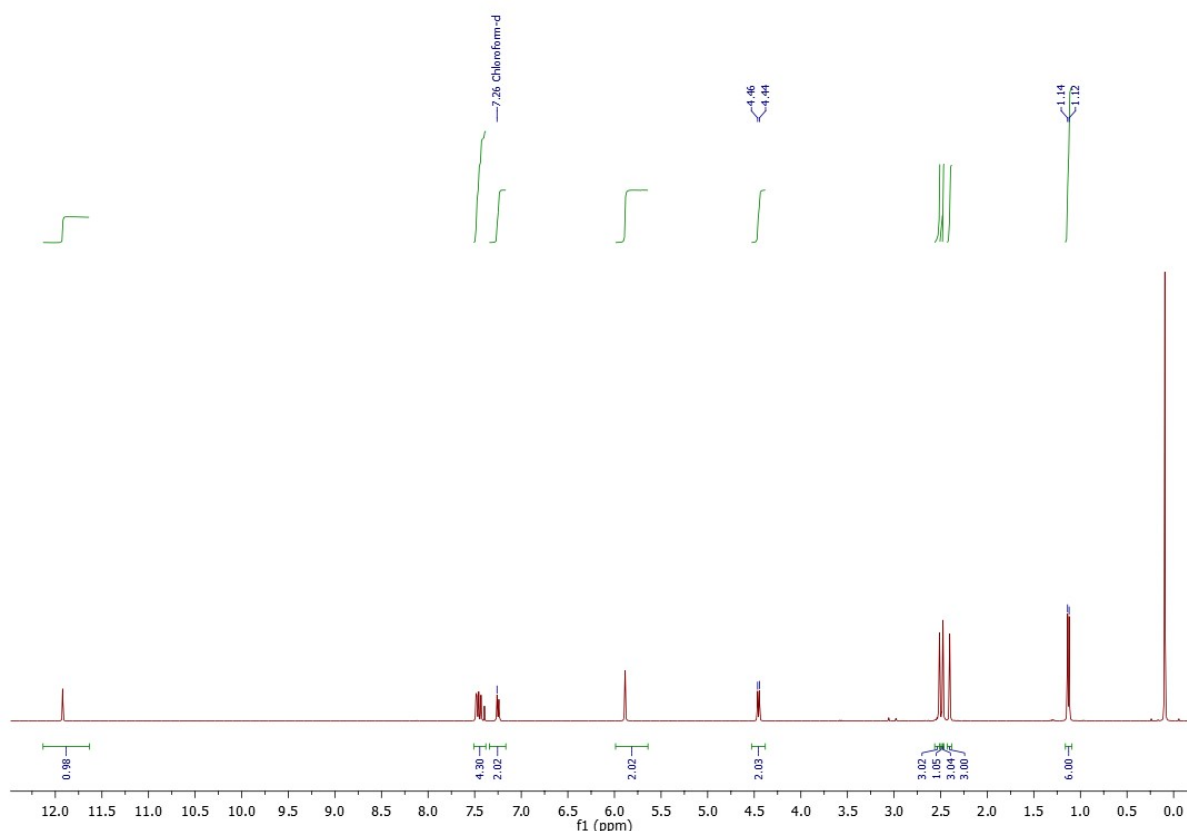

Figure S1: <sup>1</sup>H-NMR spectra of benzimidazole salt **1** in CDCl<sub>3</sub>

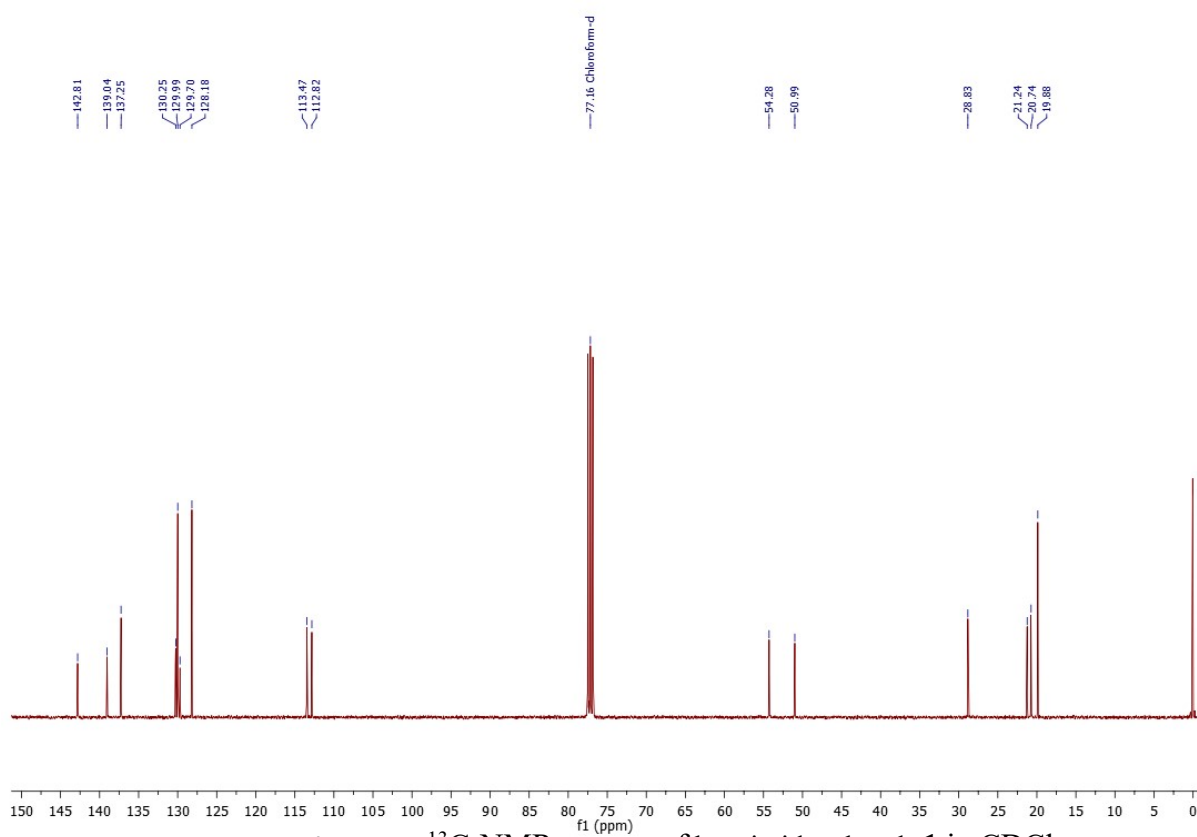

**Figure S2:**  $^{13}\text{C}$ -NMR spectra of benzimidazole salt **1** in  $\text{CDCl}_3$

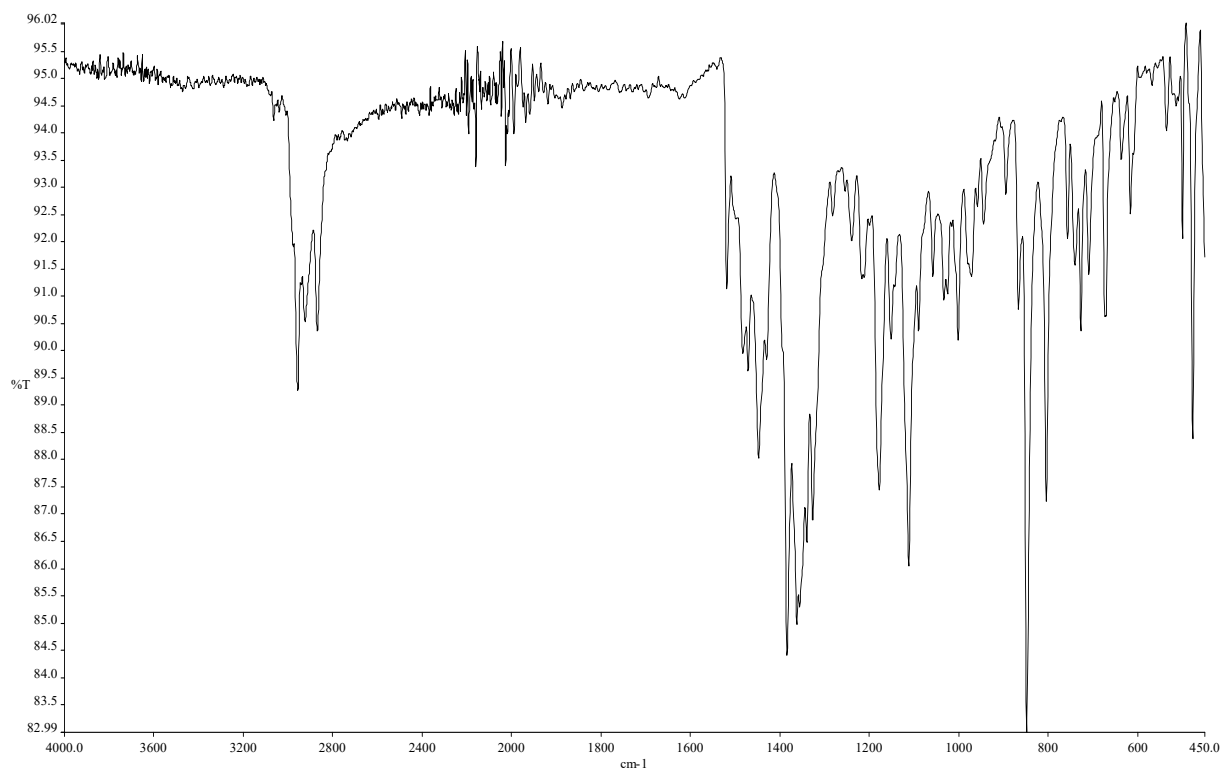

Figure S3. IR spectra on ATR unit of salt 1

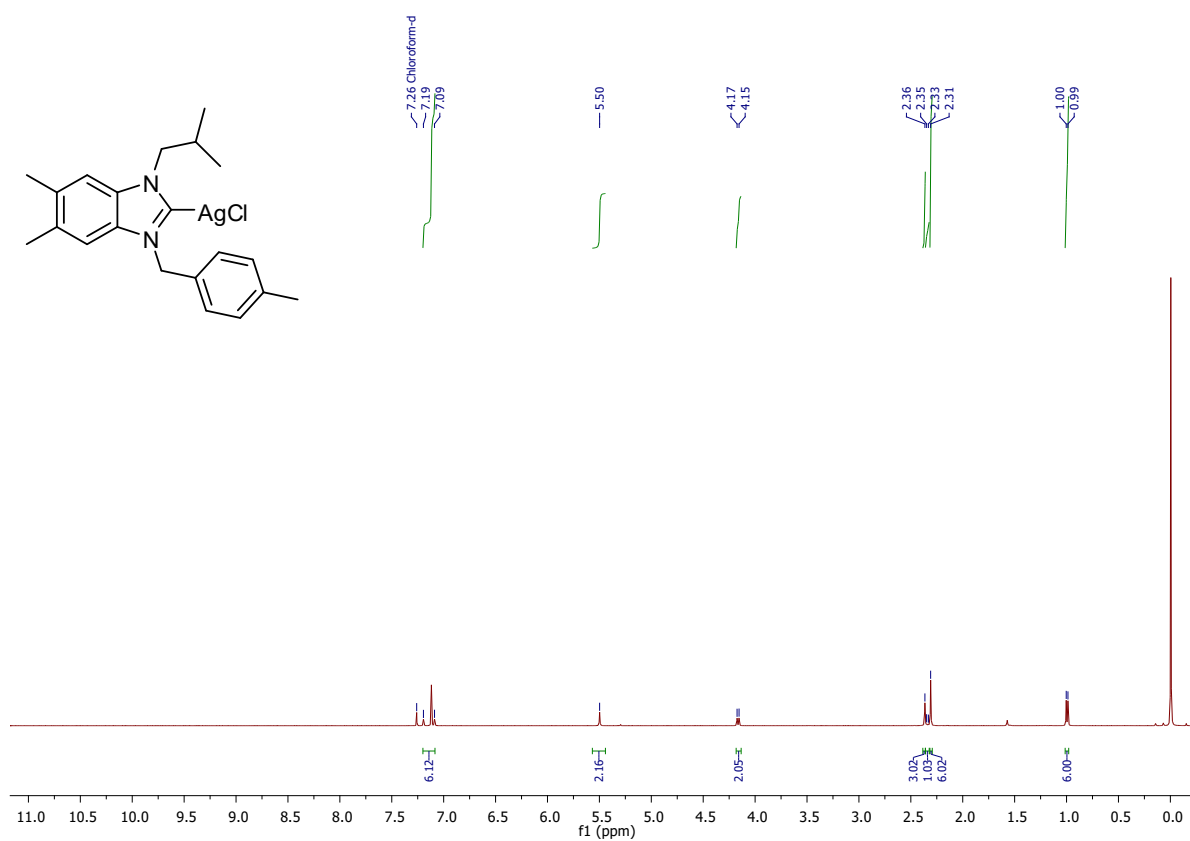

Figure S4.  $^1\text{H}$  NMR spectrum (400 MHz,  $\text{CDCl}_3$ ) of complex 2

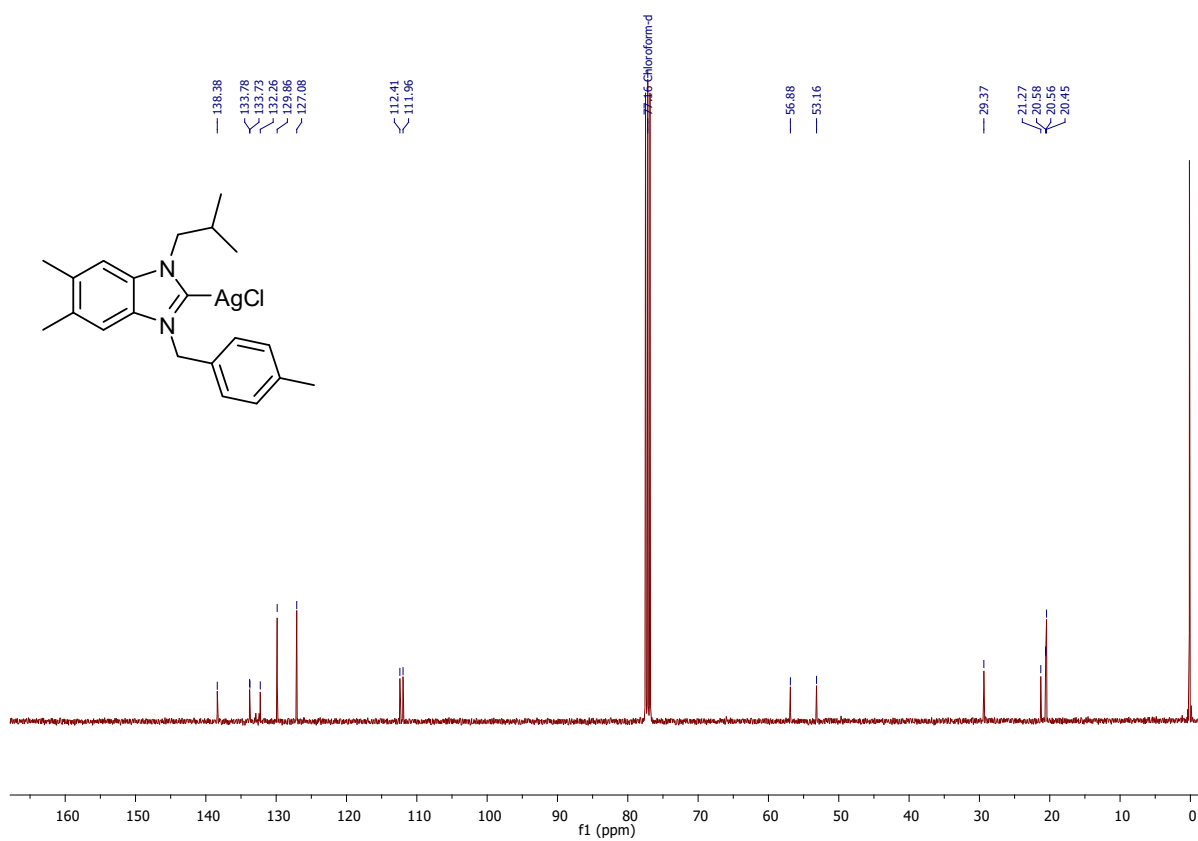

Figure S5:  $^{13}\text{C}$  NMR spectrum (100 MHz,  $\text{CDCl}_3$ ) of complex 2

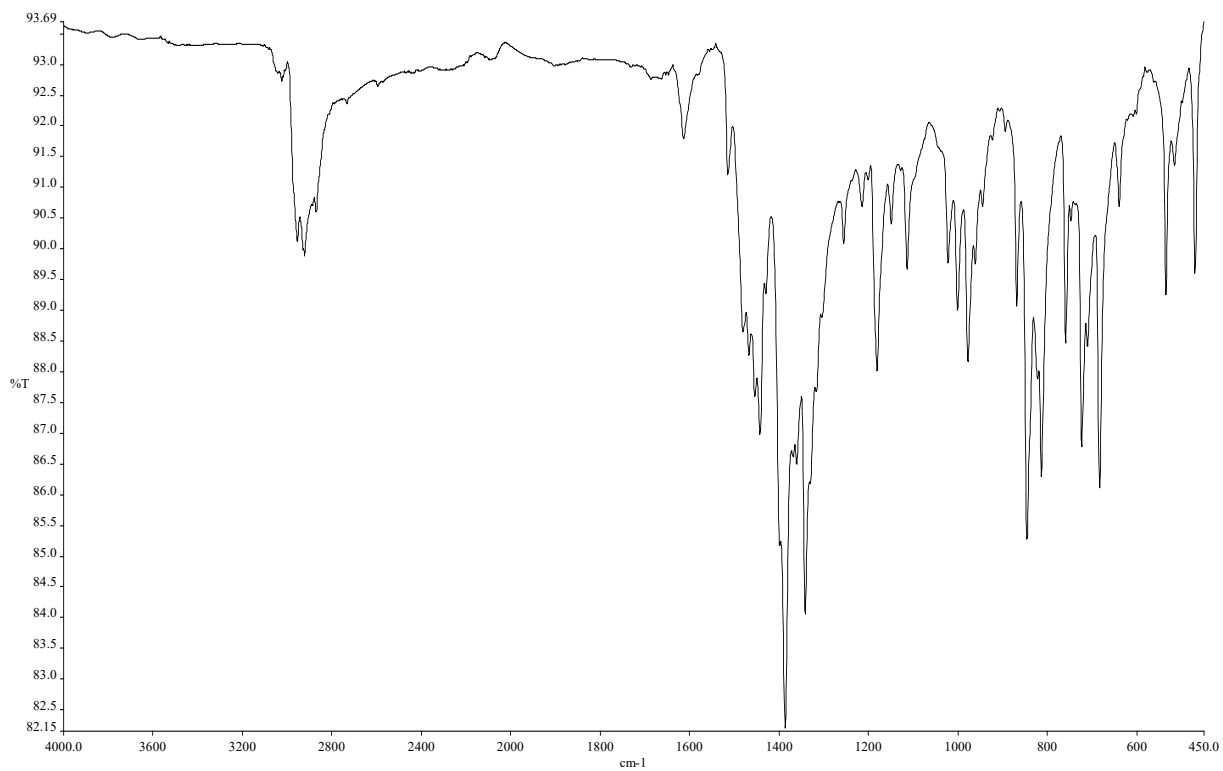

Figure S6. IR spectra on ATR unit of complex 2

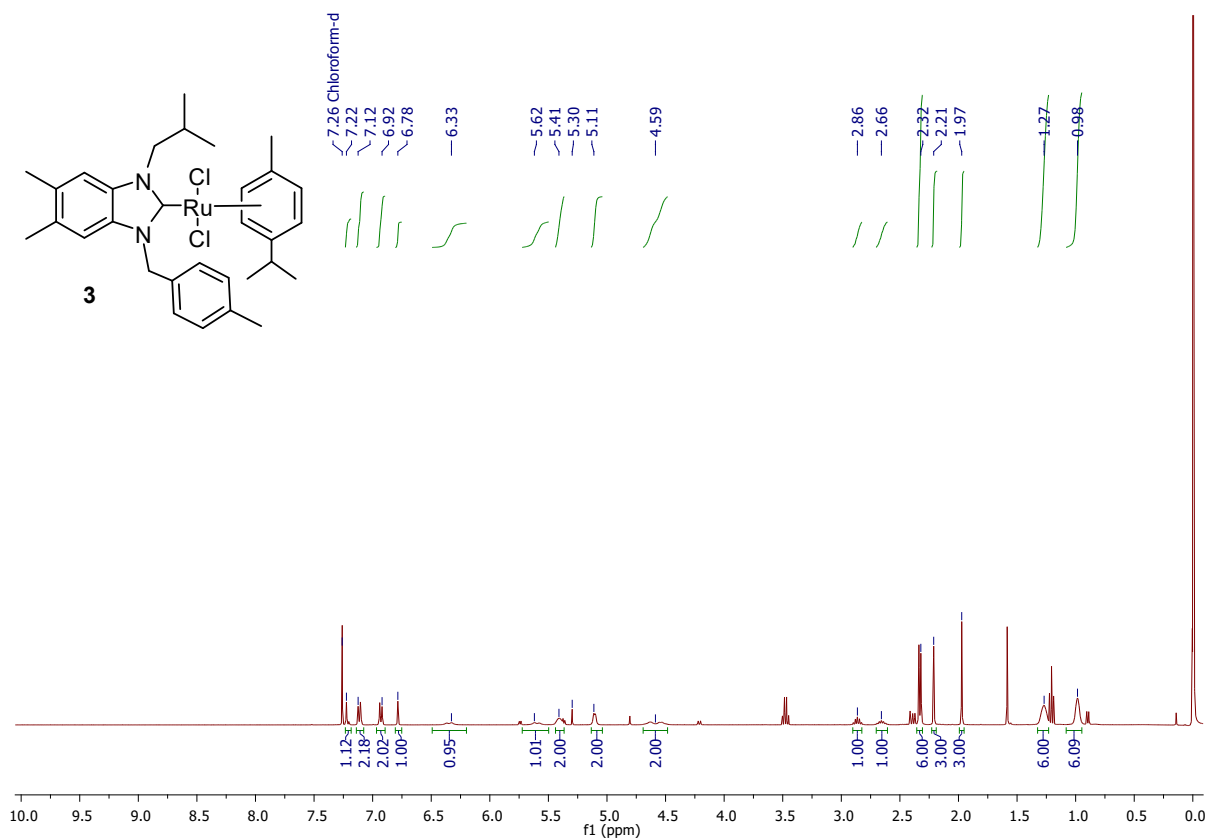

Figure S7. <sup>1</sup>H NMR spectrum (400 MHz, CDCl<sub>3</sub>) of complex 3

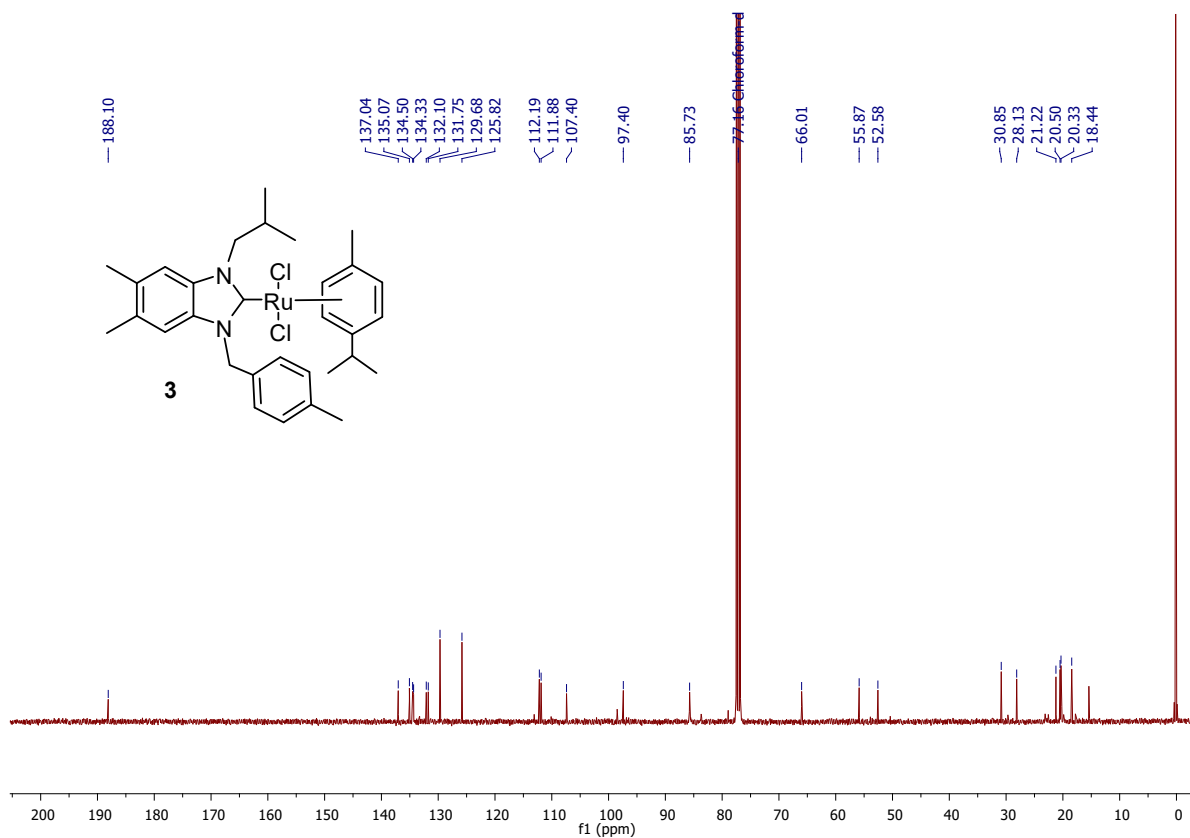

Figure S8. <sup>13</sup>C NMR spectrum (100 MHz, CDCl<sub>3</sub>) of complex 3

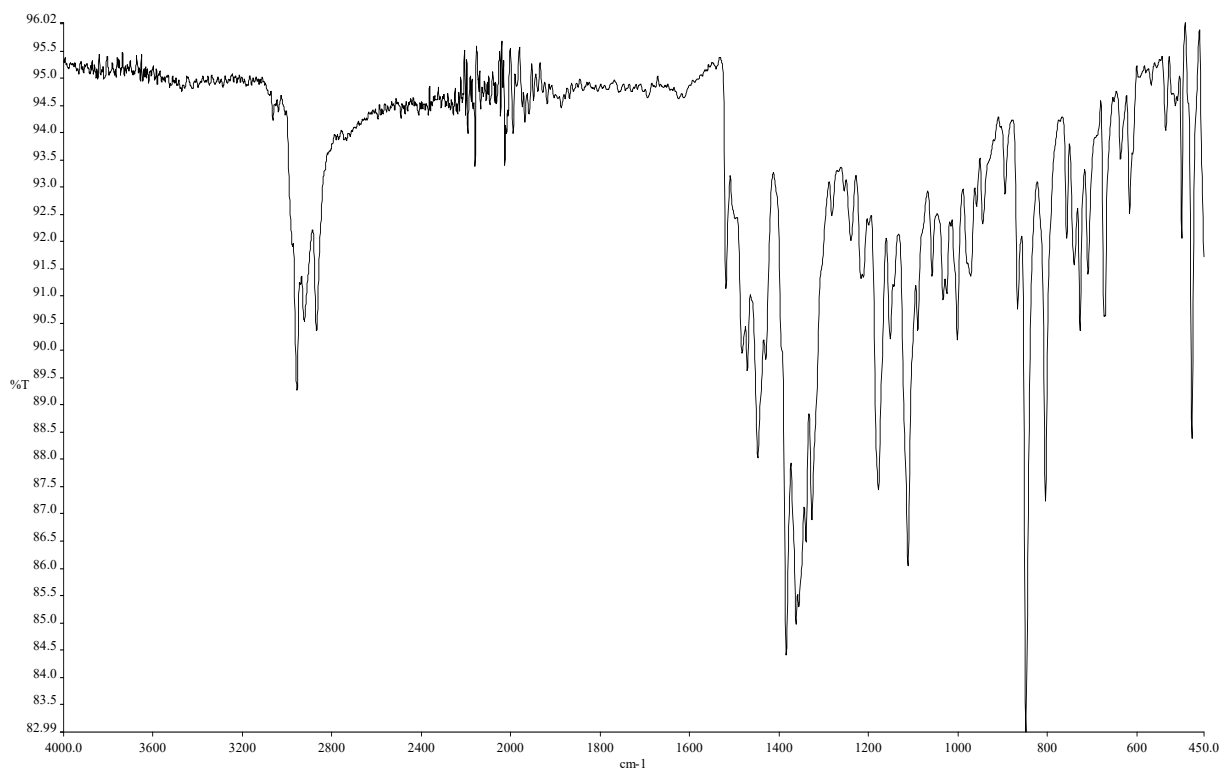

Figure S9. IR spectra on ATR unit of complex 3

### *X-ray crystallography*

X-ray data were collected on a STOE IPDS II diffractometer at room temperature using graphite-monochromated MoK $\alpha$  radiation by applying the  $\omega$ -scan method. Data collection and cell refinement were carried out using X-AREA [1] while data reduction was applied using X-RED32 [1]. The structure was solved by direct methods with SIR2019 [2] and refined by means of the full-matrix least-squares calculations on  $F^2$  using SHELXL-2018 [3]. All H atoms were located in difference maps and then treated as riding atoms, fixing the bond lengths at 0.98, 0.93, 0.97 and 0.96 Å for methine CH, aromatic CH, CH<sub>2</sub> and CH<sub>3</sub> atoms, respectively. In the complex, the isobutyl group of the NHC ligand and the isopropyl group of the *p*-cymene ligand were disordered over two sites and the refined site-occupancy factors of the disordered moieties are 0.591(12)/0.409(12)% and 0.58(4)/0.42(4)%, respectively. The displacement parameters of the H atoms were fixed at  $U_{\text{iso}}(\text{H}) = 1.2U_{\text{eq}}$  ( $1.5U_{\text{eq}}$  for CH<sub>3</sub>). Crystal data, data collection and structure refinement details are given in Table 1. Molecular graphic was generated by using OLEX2 [4].

**Table 1.** Crystal data and structure refinement parameters for complex 3

|                                                                             |                                                                                                         |
|-----------------------------------------------------------------------------|---------------------------------------------------------------------------------------------------------|
| CCDC depository                                                             | 2085331                                                                                                 |
| Color/shape                                                                 | Brown/prism                                                                                             |
| Chemical formula                                                            | [RuCl <sub>2</sub> (C <sub>10</sub> H <sub>14</sub> )(C <sub>21</sub> H <sub>26</sub> N <sub>2</sub> )] |
| Formula weight                                                              | 612.62                                                                                                  |
| Temperature (K)                                                             | 296(2)                                                                                                  |
| Wavelength (Å)                                                              | 0.71073 Mo K $\alpha$                                                                                   |
| Crystal system                                                              | Monoclinic                                                                                              |
| Space group                                                                 | <i>P</i> 2 <sub>1</sub> / <i>c</i> (No. 14)                                                             |
| Unit cell parameters                                                        |                                                                                                         |
| <i>a</i> , <i>b</i> , <i>c</i> (Å)                                          | 11.5940(5), 12.6166(5), 22.3958(9)                                                                      |
| $\alpha$ , $\beta$ , $\gamma$ (°)                                           | 90, 95.492(4), 90                                                                                       |
| Volume (Å <sup>3</sup> )                                                    | 3260.9(2)                                                                                               |
| <i>Z</i>                                                                    | 4                                                                                                       |
| <i>D</i> <sub>calc.</sub> (g/cm <sup>3</sup> )                              | 1.248                                                                                                   |
| $\mu$ (mm <sup>-1</sup> )                                                   | 0.664                                                                                                   |
| Absorption correction                                                       | Integration                                                                                             |
| <i>T</i> <sub>min.</sub> , <i>T</i> <sub>max.</sub>                         | 0.8533, 0.9632                                                                                          |
| <i>F</i> <sub>000</sub>                                                     | 1272                                                                                                    |
| Crystal size (mm <sup>3</sup> )                                             | 0.39 × 0.13 × 0.06                                                                                      |
| Diffractometer                                                              | STOE IPDS II                                                                                            |
| Measurement method                                                          | $\omega$ scan                                                                                           |
| Index ranges                                                                | -13 ≤ <i>h</i> ≤ 13, -15 ≤ <i>k</i> ≤ 15, -26 ≤ <i>l</i> ≤ 26                                           |
| $\vartheta$ range for data collection (°)                                   | 1.765 ≤ $\vartheta$ ≤ 25.049                                                                            |
| Reflections collected                                                       | 20762                                                                                                   |
| Independent/observed                                                        | 5782/2590                                                                                               |
| <i>R</i> <sub>int.</sub>                                                    | 0.1441                                                                                                  |
| Refinement method                                                           | Full-matrix least-squares on <i>F</i> <sup>2</sup>                                                      |
| Data/restraints/parameters                                                  | 5782/168/384                                                                                            |
| Goodness-of-fit on <i>F</i> <sup>2</sup>                                    | 0.962                                                                                                   |
| Final <i>R</i> indices [ <i>I</i> > 2 $\sigma$ ( <i>I</i> )]                | <i>R</i> <sub>1</sub> = 0.0782, <i>wR</i> <sub>2</sub> = 0.1369                                         |
| <i>R</i> indices (all data)                                                 | <i>R</i> <sub>1</sub> = 0.1846, <i>wR</i> <sub>2</sub> = 0.1723                                         |
| $\Delta\rho_{\text{max.}}$ , $\Delta\rho_{\text{min.}}$ (e/Å <sup>3</sup> ) | 0.86, -0.33                                                                                             |

## Appendix A. Supplementary data

CCDC 2085331 contains the supplementary crystallographic data for the compound reported in this article. These data can be obtained free of charge on application to CCDC, 12 Union Road, Cambridge CB2 1EZ, UK [Fax: +44 1223 336 033, e-mail: deposit@ccdc.cam.ac.uk, <https://www.ccdc.cam.ac.uk/structures/>].
